# Supplementary material for: Cellular frustration algorithms for anomaly detection applications
Source: PubMed Central journal article supplement (PMC6613704; doi:10.1371/journal.pone.0218930), 2019-07-08
Supplement: pone.0218930.s002.pdf [file pone.0218930.s002.pdf]

# S1 Fig. - Impact on results of different SVM kernel choices

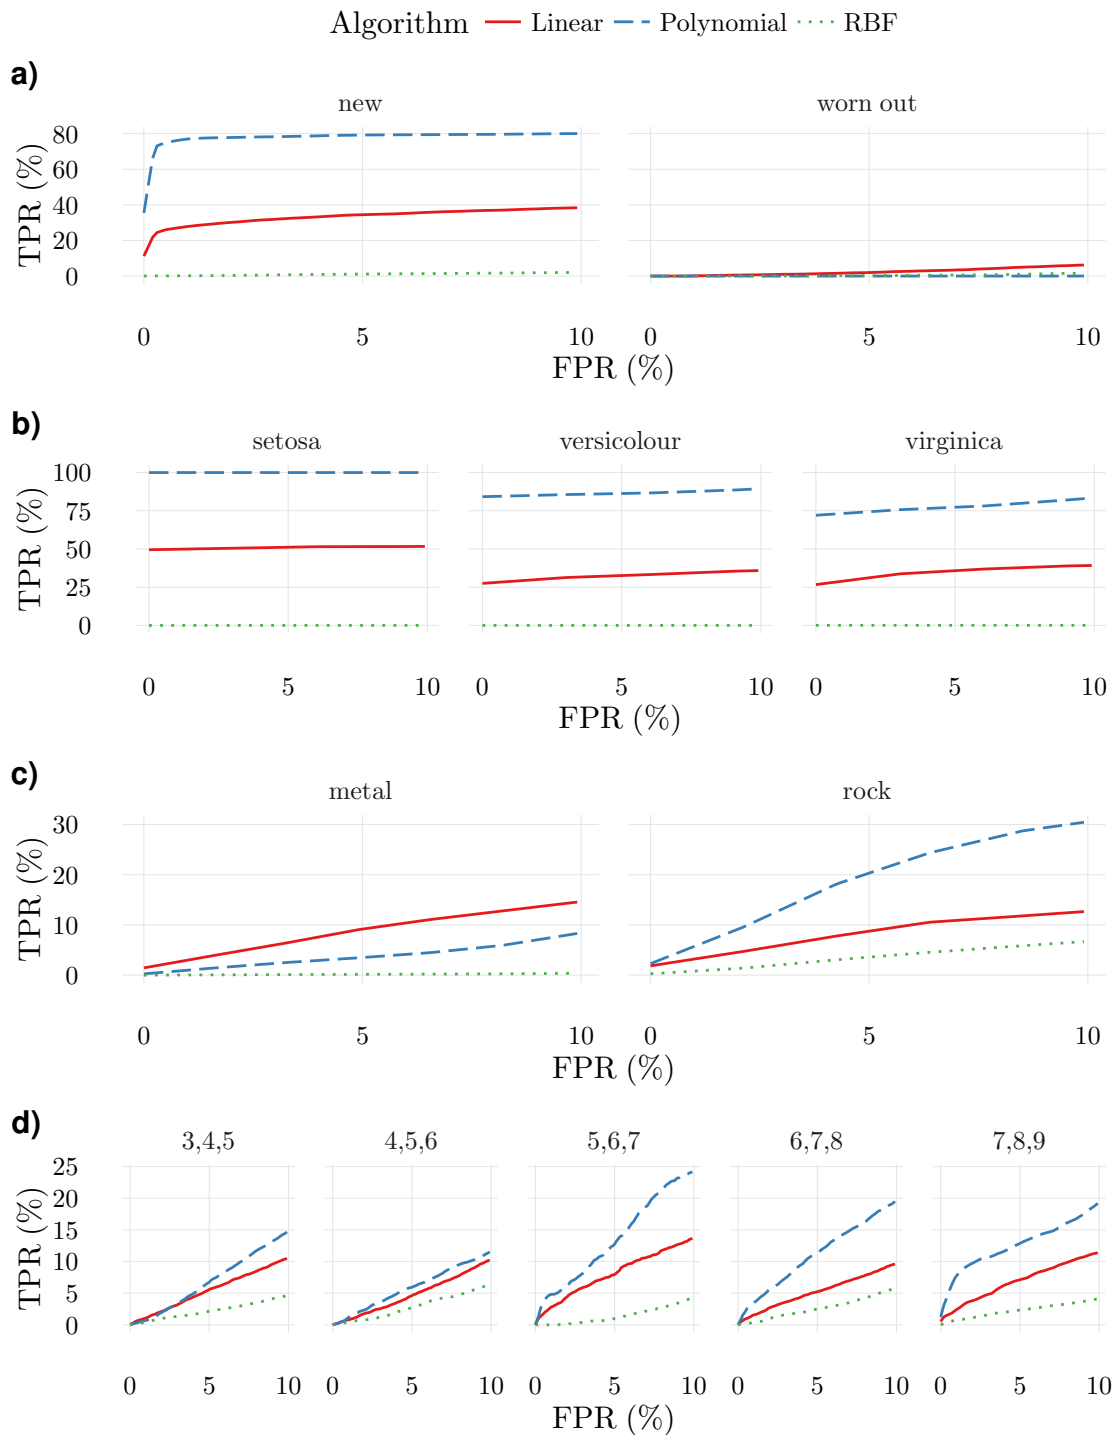

Figure 1: Impact of the kernel choice on the average TPR for the different datasets considered. Overall discrimination is best when the polynomial kernel with degree 2 is used. This was the kernel used in the results reported in this article. In these results, the  $\gamma$  parameter used for the Gaussian kernel was  $\gamma = 1/\text{dataset dimension}$ , while the polynomial and linear kernels took  $c = 0$ . All the results were obtained training models with  $v = 1/N_f$ . These are the default parameters considered in [36].
