# Supplementary material for: Cellular frustration algorithms for anomaly detection applications
Source: PubMed Central journal article supplement (PMC6613704; doi:10.1371/journal.pone.0218930), 2019-07-08
Supplement: pone.0218930.s005.pdf [file pone.0218930.s005.pdf]

## S5 Fig. - Impact on results of varying detector's connectivity

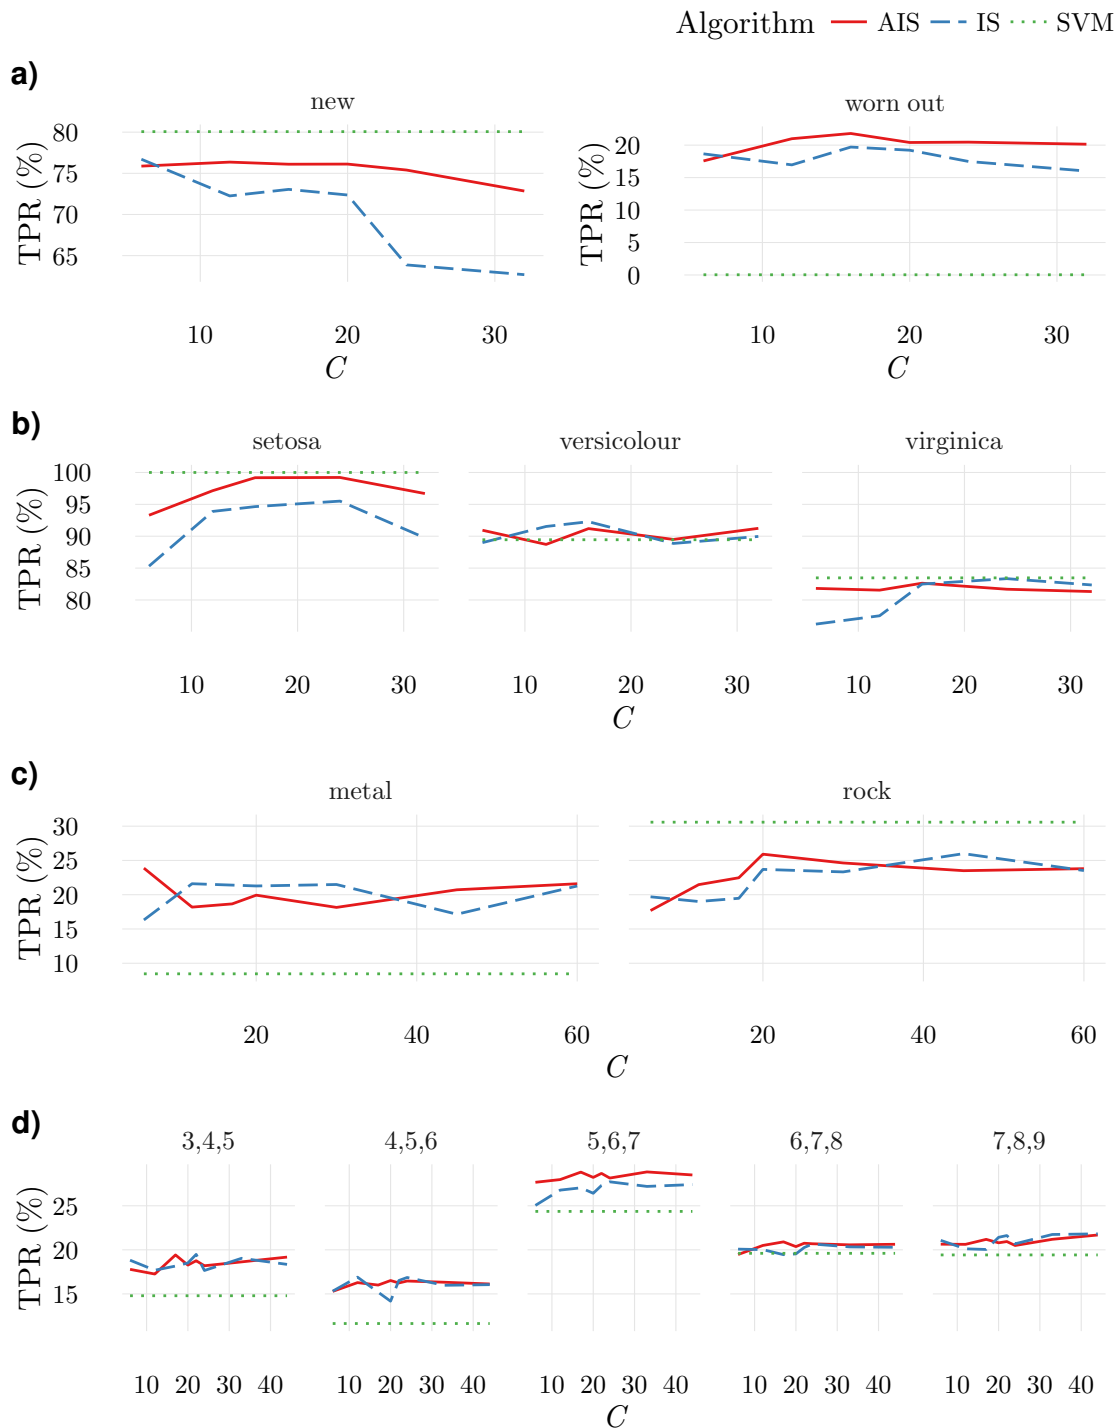

Figure 1: Average  $TPR$  obtained for different values of detectors connectivity,  $C$ . Overall increasing detectors connectivity should decrease discrimination capability. This is true for the IS and for systems with a large number of features which are also harder to educate. For the datasets analysed here the impact of  $C$  is only mild since the number of features in the several cases is relatively small. In any case, it seems clear that  $C$  should not be too small (in this case education can be very hard; see SM3) and there can be an advantage in not having full connectivity.
