# Supplementary material for: Cellular frustration algorithms for anomaly detection applications
Source: PubMed Central journal article supplement (PMC6613704; doi:10.1371/journal.pone.0218930), 2019-07-08
Supplement: pone.0218930.s006.pdf [file pone.0218930.s006.pdf]

S6 Fig. - Impact on results of varying  $T_S$

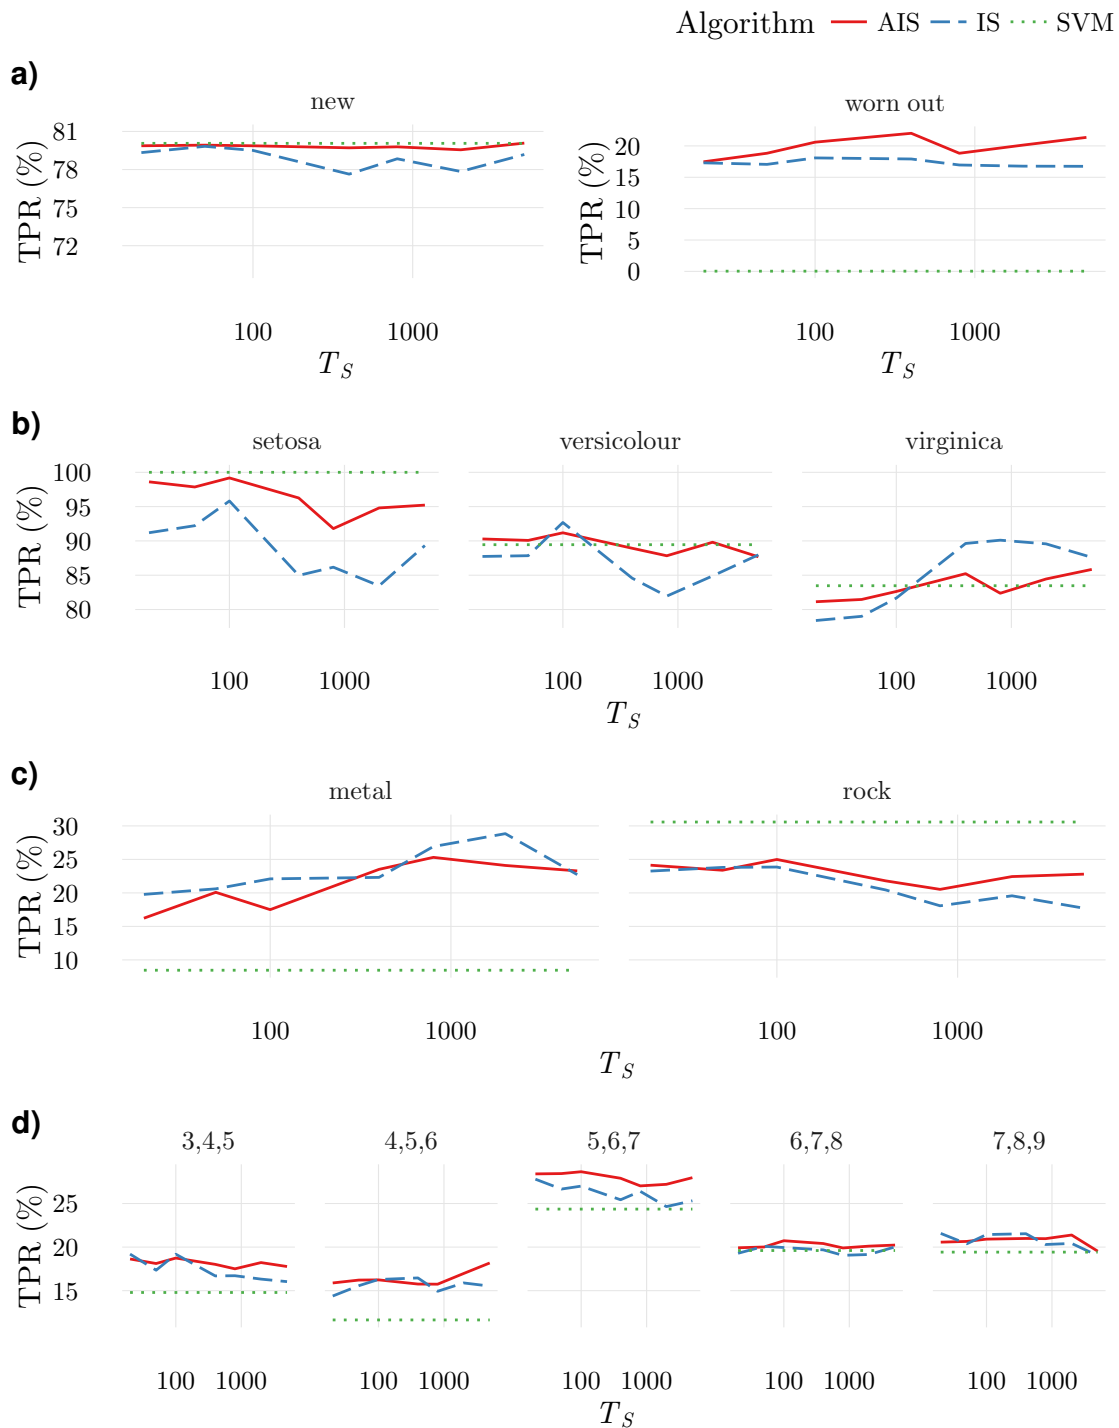

Figure 1: Impact of changing  $T_S$ , the number of iterations separating the presentation of different samples during training, when the time interval  $W_\tau$  required to decrease the pairing duration threshold,  $\tau_n$ , is held fixed. These results show that in the AIS the impact of  $T_S$  results in extremely reduced. This is due to the fact that education in the AIS has memory making it less critical to present a large number of samples in a short time interval. Therefore, for the new strategy, the impact of  $T_S$  variations is small. The values of  $T_S$  used in this plots is:  $T_S = 20, 50, 100, 400, 800, 2000, 5000$ . In each point, an average over 10 different tests involving different normal samples, have been calculated.
