# Supplementary material for: Cellular frustration algorithms for anomaly detection applications
Source: PubMed Central journal article supplement (PMC6613704; doi:10.1371/journal.pone.0218930), 2019-07-08
Supplement: pone.0218930.s007.pdf [file pone.0218930.s007.pdf]

S7 Fig. - Impact on results of varying  $W_d$

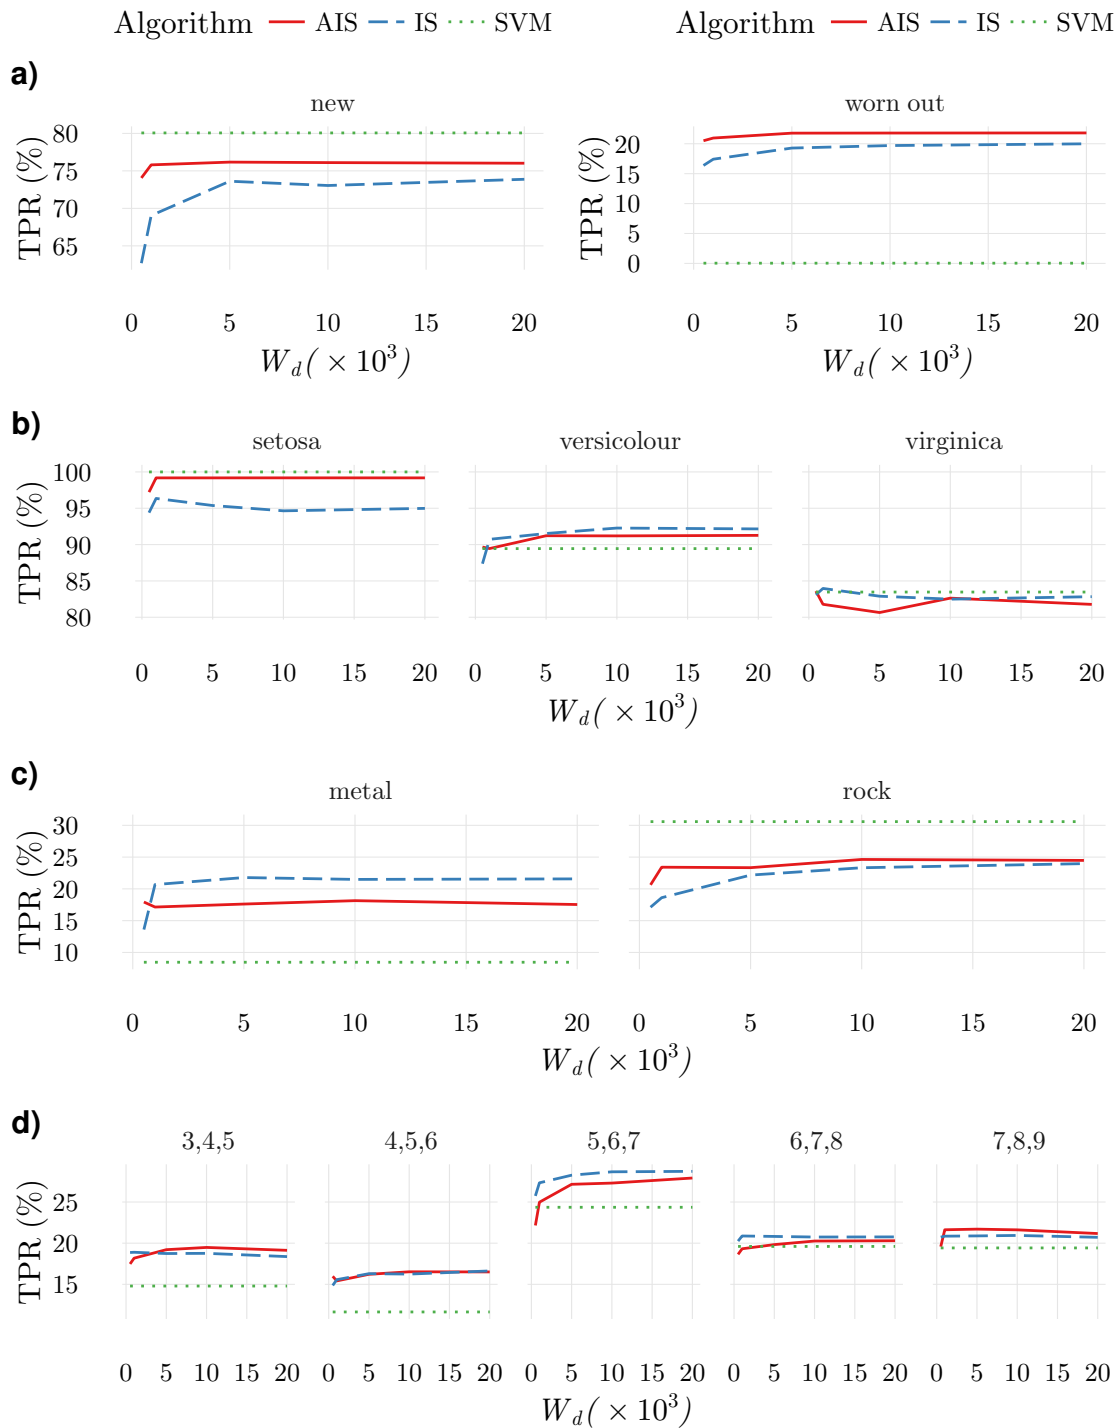

Figure 1: Average  $TPRs$  obtained for different values of  $W_d$ . Overall these results show that beyond  $W_d \sim 5000$  iterations, the performance of the method becomes stable. Therefore,  $W_d$  is also a parameter requiring no tuning. In the results reported in this paper we used  $W_d = 10000$ .
