# Supplementary material for: Cellular frustration algorithms for anomaly detection applications
Source: PubMed Central journal article supplement (PMC6613704; doi:10.1371/journal.pone.0218930), 2019-07-08
Supplement: pone.0218930.s010.pdf [file pone.0218930.s010.pdf]

### S3 Table-Average $TPR$ obtained for the several algorithms

Table 1: Average  $TPR$  and associated standard deviations obtained considering a 10%  $FPR$ . Also shown is the impact of increasing the repertoire population size from 1 to 12 populations of detectors in CFAs. Here,  $N.D.$  stands for "no detection". Overall, these results show that: 1)larger repertoires improve slightly the accuracy; 2) CFAs have comparable, if not better overall accuracies than one class SVM.

| Number of populations |                      | AIS   |          |       |          | IS    |          |       |          | SVM    |          |
|-----------------------|----------------------|-------|----------|-------|----------|-------|----------|-------|----------|--------|----------|
|                       |                      | 1     |          | 12    |          | 1     |          | 12    |          | $\mu$  | $\sigma$ |
| dataset               | normal training data | $\mu$ | $\sigma$ | $\mu$ | $\sigma$ | $\mu$ | $\sigma$ | $\mu$ | $\sigma$ | $\mu$  | $\sigma$ |
| ball bearings         | new                  | 75.8  | 7.4      | 76.1  | 6.3      | 71.6  | 9.7      | 74.5  | 8.7      | 80.1   | 0.2      |
|                       | worn out             | 20.1  | 5.5      | 22.0  | 8.1      | 18.0  | 3.9      | 19.7  | 6.9      | $N.D.$ | $N.D.$   |
| iris                  | setosa               | 94.1  | 13.6     | 99.5  | 1.7      | 94.2  | 13.5     | 96.4  | 7.2      | 100.0  | 0.0      |
|                       | versicolour          | 90.0  | 10.4     | 89.8  | 9.9      | 88.1  | 13.6     | 92.5  | 9.5      | 89.5   | 4.5      |
|                       | virginica            | 83.6  | 6.3      | 82.3  | 9.5      | 80.8  | 11.2     | 81.5  | 9.2      | 83.5   | 7.5      |
| sonar                 | metal                | 17.4  | 11.6     | 17.4  | 9.7      | 18.1  | 12.6     | 20.9  | 9.3      | $N.D.$ | $N.D.$   |
|                       | rock                 | 24.9  | 6.8      | 25.9  | 5.8      | 24.3  | 5.9      | 23.4  | 8.0      | 30.6   | 3.7      |
| wines                 | 3,4,5                | 16.5  | 4.2      | 18.5  | 3.4      | 17.9  | 4.6      | 19.6  | 2.0      | 14.8   | 1.5      |
|                       | 4,5,6                | 15.3  | 2.9      | 16.5  | 2.3      | 15.9  | 3.3      | 16.3  | 2.4      | 11.6   | 1.2      |
|                       | 5,6,7                | 27.4  | 1.7      | 28.2  | 1.1      | 25.1  | 3.2      | 26.9  | 2.4      | 24.4   | 1.0      |
|                       | 6,7,8                | 20.2  | 2.2      | 20.7  | 1.5      | 18.9  | 2.7      | 20.1  | 2.0      | 19.6   | 0.8      |
|                       | 7,8,9                | 19.7  | 2.2      | 20.7  | 3.37     | 21.6  | 2.63     | 21.0  | 2.4      | 19.4   | 1.1      |
